# Supplementary material for: Impact of ABO incompatibility on patients’ outcome after haploidentical hematopoietic stem cell transplantation for acute myeloid leukemia - a report from the Acute Leukemia Working Party of the EBMT
Source: PubMed Central journal article supplement — Haematologica. 2017 Jun;102(6):1066–74. doi: 10.3324/haematol.2016.160804 (PMC5451338; doi:10.3324/haematol.2016.160804), 2017-06
Supplement: 2016_160804-Disclosures_and_Contributions.pdf [file 2016_160804-Disclosures_and_Contributions.pdf]

Haematologica  
HAEMATOL/2016/160804  
Version 3

Impact of ABO incompatibility on patient outcome in haploidentical hematopoietic stem cell transplantation for acute myeloid leukemia - a report from the acute leukemia working party of the EBMT

Jonathan Canaani, Bipin N. Savani, Myriam Labopin, Xiao-jun Huang, Fabio Ciceri, William Arcese, Johanna Tischer, Yener Koc, Benedetto Bruno, Zafer Gülbas, Didier Blaise, Johan Maertens, Gerhard Ehninger, Mohamad Mohty, and Arnon Nagler

Disclosures: All authors declare no conflict of interest or any disclosures to report.

Contributions: BNS, JC, ML, MM, EP, and AN designed the research and/or analyzed the data. JC, BNS, ML, MM and AN wrote the first manuscript draft. XH, FC, WA, JT, YK, BB, ZG, DB, JM, and GE provided clinical data and commented on manuscript. All authors read and approved the final manuscript.
